# Supplementary material for: Safety and immunogenicity of COVID-19 vaccination in immunocompromised patients
Source: PubMed Central journal article supplement — Chin Med J (Engl). 2022 Dec 27;135(22):2656–66. doi: 10.1097/CM9.0000000000002505 (PMC9945070; doi:10.1097/cm9.0000000000002505), 2022-12-27
Supplement: cm9-135-2656-s001.pdf [file cm9-135-2656-s001.pdf]

**Supplementary Table 1. Clinical trials of COVID-19 vaccine in people living with HIV.**

| NCT number  | Title                                                                                                                                                                                                    | Status             | Study type     | Phase   | Study design                    | Number enrolled | Vaccination type | Region       |
|-------------|----------------------------------------------------------------------------------------------------------------------------------------------------------------------------------------------------------|--------------------|----------------|---------|---------------------------------|-----------------|------------------|--------------|
| NCT05075044 | Immunogenicity and safety of an inactivated COVID-19 vaccine in people aged $\geq 18$ years with HIV infected                                                                                            | Recruiting         | Interventional | Phase 4 | Open label, single group        | 400             | Inactivated      | China        |
| NCT05075070 | Immunogenicity and safety of an inactivated COVID-19 vaccine in people with HIV infected                                                                                                                 | Recruiting         | Interventional | Phase 4 | Open label, single group        | 400             | Inactivated      | China        |
| NCT05105295 | Immunogenicity and a safety of a third dose and immune persistence of BBIBP-Corv vaccine in people with HIV infected                                                                                     | Not yet recruiting | Interventional | Phase 4 | Open label, single group        | 400             | Inactivated      | China        |
| NCT05085145 | The efficacy of COVID-19 vaccine in patients with HIV infection, a prospective and multicenter clinical trial                                                                                            | Recruiting         | Interventional | Phase 4 | Open label, single group        | 200             | Unlimited        | China        |
| NCT04894448 | Immunogenicity outcomes in people living with HIV following vaccination for COVID-19 (HIV-COV)                                                                                                           | Recruiting         | Observational  | NA      | Prospective                     | 500             | Unlimited        | China        |
| NCT05043129 | Safety and immune response of COVID-19 vaccination in patients with HIV infection                                                                                                                        | Recruiting         | Observational  | NA      | Prospective                     | 200             | Unlimited        | China        |
| NCT05435027 | A phase 1 SARS-CoV-2 vaccine study to assess the safety and tolerability of GRT-R912, GRT-R914, and GRT-R918 administered as prime and/or boost in healthy adult participants and people living with HIV | Recruiting         | Interventional | Phase 1 | Open label, parallel assignment | 340             | mRNA             | South Africa |

|             |                                                                                                                                                                                                                                                                                                                                               |                        |                |           |                 |       |                 |                             |
|-------------|-----------------------------------------------------------------------------------------------------------------------------------------------------------------------------------------------------------------------------------------------------------------------------------------------------------------------------------------------|------------------------|----------------|-----------|-----------------|-------|-----------------|-----------------------------|
| NCT04444674 | An adaptive phase I/II randomized placebo-controlled trial to determine safety, immunogenicity and efficacy of non-replicating ChAdOx1 SARS-CoV-2 vaccine in South African adults living without HIV; and safety and immunogenicity in adults living with HIV                                                                                 | Active, not recruiting | Interventional | Phase 1,2 | RCT             | 2130  | ChAdOx1 nCoV-19 | South Africa                |
| NCT05112848 | A phase 2, randomized, observer-blinded study to evaluate the safety and immunogenicity of a SARS-CoV-2 recombinant spike protein nanoparticle vaccine (SARS-CoV-2 rS) with matrix-M™ adjuvant in people living with HIV                                                                                                                      | Active, not recruiting | Interventional | Phase 2   | RCT             | 360   | NVX-CoV2373     | South Africa                |
| NCT04533399 | A phase 2A/B, randomized, observer-blinded, placebo-controlled study to evaluate the efficacy, immunogenicity, and safety of a SARS-CoV-2 recombinant spike protein nanoparticle vaccine (SARS-CoV-2 rS) with matrix-M1™ adjuvant in South African adult subjects living without HIV; and safety and immunogenicity in adults living with HIV | Completed              | Interventional | Phase 2   | RCT             | 4422  | NVX-CoV2373     | South Africa                |
| NCT05168813 | Multi-center, randomized, efficacy study of COVID-19 mRNA vaccine in regions with SARS-CoV-2 variants of concern                                                                                                                                                                                                                              | Recruiting             | Interventional | Phase 2,3 | RCT             | 15600 | mRNA-1273       | Eastern and Southern Africa |
| NCT04779996 | Antibodies production after COVID-19 vaccination among patients with medical history of cancer and anti-CD-20 treatment                                                                                                                                                                                                                       | Recruiting             | Observational  | NA        | Cross-sectional | 250   | Unlimited       | Puerto Rico                 |

|             |                                                                                                                                                                                                                                                                                                                                                     |            |                |         |                                 |      |           |                |
|-------------|-----------------------------------------------------------------------------------------------------------------------------------------------------------------------------------------------------------------------------------------------------------------------------------------------------------------------------------------------------|------------|----------------|---------|---------------------------------|------|-----------|----------------|
| NCT05067400 | SARS-CoV-2 (COVID-19) antibody prevalence in an adult London HIV cohort                                                                                                                                                                                                                                                                             | Recruiting | Observational  | NA      | Cross-sectional                 | 1500 | Unlimited | United Kingdom |
| NCT04844489 | Study of the humoral response to SARS-CoV-2 variants and of the cellular response after vaccination against COVID-19 in immunocompromised people                                                                                                                                                                                                    | Recruiting | Interventional | NA      | Open label, single group        | 485  | Unlimited | France         |
| NCT04754698 | Immunogenicity and safety of the CoronaVac vaccine in patients with autoimmune rheumatic diseases and people living with HIV/AIDS                                                                                                                                                                                                                   | Recruiting | Interventional | Phase 4 | Open label, parallel assignment | 2067 | CoronaVac | Brazil         |
| NCT05104359 | Should COVID-19 quantitative antibody titers be implemented to guide COVID-19 booster vaccinations regardless of HIV status, immunosuppression, or age?                                                                                                                                                                                             | Completed  | Observational  | NA      | Cohort, retrospective           | 825  | Unlimited | United States  |
| NCT05005156 | A randomized, double-blind, placebo-controlled, phase IIb clinical Trial to evaluate the efficacy, safety and immunogenicity of one or two doses of recombinant novel coronavirus vaccine (Adenovirus Type 5 Vector) in adults 18 years of age and older, living with HIV, on stable treatment, and virologically suppressed for at least 6 months. | Recruiting | Interventional | Phase 2 | RCT                             | 876  | Ad5-nCoV  | Argentina      |

RCT: Randomized controlled trial; NA: Not applicable; AIDS: Acquired immunodeficiency syndrome; NA: Not applicable; RCT: Randomized controlled trial;

COVID-19: Coronavirus disease 2019; HIV: Human immunodeficiency virus; SARS-CoV-2: Severe acute respiratory syndrome coronavirus 2.
